# Supplementary material for: Testing anxiety in undergraduate medical students and its correlation with different learning approaches
Source: PubMed Central journal article supplement (PMC6415780; doi:10.1371/journal.pone.0210130), 2019-03-13
Supplement: pone.0210130.s001.pdf [file pone.0210130.s001.pdf]

| student | STAI-T (T0) | STAI-S (T1) | STAI-S (T3) | Cortisol (T1)<br>nmol/l | Cortisol (T2)<br>nmol/l | Cortisol (T3)<br>nmol/l | Cortisol (T4)<br>nmol/l | school<br>leaving<br>grade | SPF (score) |
|---------|-------------|-------------|-------------|-------------------------|-------------------------|-------------------------|-------------------------|----------------------------|-------------|
| 1       | 41          | 55          | 54          | 15.90                   | 6.93                    | 11.70                   | 10.00                   | 2.7                        | 41          |
| 2       | 63          | 51          | 43          | 6.01                    | 5.56                    | 4.34                    | 1.50                    | 1.0                        | 49          |
| 3       | 32          | 28          | 26          | 7.02                    | 8.62                    | 8.85                    | 10.30                   | 2.5                        |             |
| 4       | 43          | 52          | 39          | 4.69                    | 3.13                    | 7.75                    | 3.97                    | 1.4                        | 41          |
| 5       | 37          | 54          | 55          | 6.70                    | 4.56                    | 6.26                    | 5.56                    | 1.7                        | 49          |
| 6       | 31          | 65          | 66          | 10.50                   | 4.96                    | 14.70                   | 3.07                    | 2.5                        | 34          |
| 7       | 39          | 57          | 42          | 7.86                    | 7.28                    | 19.40                   | 9.52                    | 1.0                        | 45          |
| 8       | 42          | 58          | 60          | 7.16                    | 5.03                    | 9.76                    | 7.30                    | 1.5                        | 41          |
| 9       | 60          | 58          | 60          | 11.20                   | 5.22                    | 8.44                    | 2.40                    | 1.6                        |             |
| 10      | 43          | 70          | 67          | 14.40                   | 3.54                    | 15.50                   | 6.84                    | 2.7                        | 45          |
| 11      | 27          | 45          | 33          | 6.68                    | 4.86                    | 7.27                    | 4.38                    | 1.0                        | 42          |
| 12      | 48          | 54          | 59          | 15.60                   | 8.28                    | 19.60                   | 14.70                   | 2.5                        | 40          |
| 13      | 33          | 40          | 57          | 6.74                    | 1.96                    | 10.60                   | 5.84                    | 1.2                        | 48          |
| 14      | 58          | 49          | 48          | 5.08                    | 9.04                    | 11.70                   | 5.25                    | 2.7                        |             |
| 15      | 36          | 37          | 38          | 6.91                    | 21.50                   | 16.70                   | 15.40                   | 1.0                        | 42          |
| 16      | 75          | 67          | 69          | 12.30                   | 12.30                   | 12.90                   | 10.00                   | 2.5                        | 55          |
| 17      | 31          | 52          | 53          | 9.60                    | 7.48                    | 4.81                    | 7.57                    | 1.0                        | 52          |
| 18      | 30          | 74          | 71          | 13.80                   | 8.92                    | 15.70                   | 6.06                    | 2.8                        | 42          |
| 19      | 35          | 43          | 48          | 7.30                    | 9.39                    | 6.31                    | 5.82                    | 1.8                        | 34          |
| 20      | 44          | 46          | 52          | 5.71                    | 13.50                   | 8.20                    | 5.65                    | 1.0                        | 47          |
| 21      | 33          | 53          | 48          | 8.45                    | 4.10                    | 7.27                    | 20.10                   | 1.0                        | 39          |
| 22      | 34          | 48          | 45          | 5.71                    | 5.00                    | 9.66                    | 10.40                   | 1.0                        |             |
| 23      | 47          | 51          | 63          | 5.51                    | 5.61                    | 6.93                    | 6.63                    | 2.8                        | 44          |
| 24      | 26          | 36          | 37          | 4.50                    | 5.32                    | 4.72                    | 4.17                    | 1.4                        | 40          |
| 25      | 38          | 55          | 53          | 8.13                    | 6.95                    | 11.60                   | 6.76                    | 1.3                        | 39          |
| 26      | 41          | 63          | 57          | 8.17                    | 5.18                    | 10.40                   | 6.74                    | 1.1                        | 44          |
| 27      | 34          | 47          | 53          | 8.57                    | 6.88                    | 11.40                   | 10.20                   | 1.0                        | 52          |
| 28      | 39          | 36          | 47          | 13.80                   | 11.10                   | 8.21                    | 6.42                    | 1.9                        |             |
| 29      | 33          | 53          | 51          | 9.13                    | 10.00                   | 11.90                   | 8.39                    | 1.0                        | 40          |
| 30      | 37          | 55          | 46          | 13.20                   | 11.60                   | 5.13                    | 7.01                    | 1.0                        | 45          |
| 31      | 45          | 70          | 59          | 19.10                   | 4.70                    | 8.51                    | 5.63                    | 1.3                        | 44          |
| 32      | 45          | 49          | 56          | 8.99                    | 4.32                    | 5.77                    | 4.76                    | 1.1                        | 36          |
| 33      | 34          | 43          | 50          | 9.27                    | 3.26                    | 10.20                   | 3.69                    | 1.3                        | 41          |
| 34      | 53          | 63          | 44          | 9.59                    | 3.02                    | 4.72                    | 14.40                   | 1.1                        | 39          |
| 35      | 38          | 67          | 67          | 6.89                    | 21.30                   | 12.70                   | 4.47                    | 1.5                        | 33          |
| 36      | 39          | 48          | 49          | 4.92                    | 7.68                    | 13.00                   | 8.50                    | 1.1                        | 57          |

|    |    |    |    |       |       |       |       |     |    |
|----|----|----|----|-------|-------|-------|-------|-----|----|
| 37 | 44 | 56 | 65 | 4.87  | 4.41  | 8.58  | 3.34  | 1.3 | 44 |
| 38 | 38 | 58 | 64 | 11.20 | 5.60  | 8.50  | 12.50 | 1.6 | 51 |
| 39 | 33 | 39 | 50 | 11.10 | 6.39  | 6.23  | 15.60 | 1.4 | 44 |
| 40 | 39 | 58 | 55 | 10.30 | 4.70  | 22.50 | 28.30 | 1.2 | 44 |
| 41 | 31 | 59 | 48 | 14.70 | 17.70 | 9.40  | 4.08  | 1.5 | 50 |
| 42 | 55 | 46 | 61 | 6.64  | 7.99  | 4.34  | 3.98  | 1.4 | 35 |
| 43 | 32 | 59 | 40 | 12.60 | 9.51  | 12.70 | 13.50 | 1.2 | 40 |
| 44 | 31 | 46 | 51 | 5.84  | 4.74  | 4.73  | 4.98  | 1.1 | 40 |
| 45 | 40 | 56 | 59 | 9.17  | 12.60 | 9.94  | 7.12  | 1.1 |    |
| 46 | 61 | 69 | 76 | 3.68  | 4.51  | 5.01  | 5.30  | 1.5 |    |
| 47 | 46 | 59 | 65 | 7.06  | 3.13  | 4.63  | 2.70  | 1.5 | 41 |
| 48 | 45 | 49 | 73 | 5.94  | 9.49  | 13.10 | 9.04  | 1.4 | 51 |
| 49 | 49 | 55 | 56 | 9.27  | 3.74  | 3.88  | 7.36  | 1.4 | 49 |
| 50 | 27 | 33 | 39 | 4.92  | 4.39  | 8.95  | 4.80  | 1.5 | 50 |
| 51 | 33 | 55 | 60 | 8.28  | 9.76  | 8.99  | 9.86  | 1.4 | 42 |
| 52 | 36 | 63 | 72 | 10.90 | 13.70 | 14.00 | 2.76  |     |    |
| 53 | 51 | 64 | 70 | 10.90 | 9.11  | 10.40 | 11.60 | 1.4 | 46 |
| 54 | 44 | 55 | 54 | 24.60 | 10.70 | 8.88  | 4.65  | 1.4 | 48 |
| 55 | 48 | 53 | 65 | 6.36  | 9.36  | 5.96  | 4.54  | 1.4 | 46 |
| 56 | 32 | 65 | 65 | 23.80 | 7.71  | 15.50 | 2.05  | 1.4 | 38 |
| 57 | 39 | 44 | 39 | 7.31  | 8.43  | 8.49  | 11.80 | 1.1 | 42 |
| 58 | 35 | 44 | 38 | 14.40 | 13.20 | 9.04  | 11.50 | 1.2 | 37 |
| 59 | 64 | 62 | 71 | 6.66  | 7.54  | 10.70 | 4.02  | 1.2 | 44 |
| 60 | 55 | 44 | 60 | 7.44  | 2.93  | 25.10 | 9.52  | 1.5 | 42 |
| 61 | 44 | 46 | 67 | 6.08  | 6.07  | 5.56  | 2.44  | 1.3 | 42 |
| 62 | 67 | 49 | 51 | 4.87  | 16.20 | 18.60 | 12.90 | 1.3 | 47 |
| 63 | 33 | 48 | 55 | 7.34  | 9.67  | 21.20 | 11.30 | 1.4 | 40 |
| 64 | 28 | 55 | 51 | 20.70 | 2.30  | 9.18  | 7.86  | 1.0 | 37 |
| 65 | 54 | 68 | 54 | 9.00  | 6.42  | 11.60 | 7.70  | 1.2 | 54 |
| 66 | 32 | 74 | 68 | 9.94  | 7.23  | 9.33  | 4.80  | 1.2 | 44 |
| 67 | 64 | 43 | 42 | 7.36  | 8.96  | 11.30 | 8.59  | 1.2 | 47 |
| 68 | 37 | 57 | 60 | 5.22  | 4.65  | 6.31  | 6.46  | 1.4 |    |
| 69 | 38 | 65 | 44 | 25.40 | 12.80 | 21.40 | 2.75  |     |    |
| 70 | 38 | 42 | 45 | 11.20 | 5.63  | 10.90 | 8.07  | 1.2 | 48 |
| 71 | 39 | 54 | 64 | 7.00  | 4.17  | 6.99  | 3.04  | 1.3 | 44 |
| 72 | 38 | 44 | 51 | 8.47  | 8.61  | 27.60 | 15.30 | 1.4 | 42 |
| 73 | 36 | 44 | 52 | 16.20 | 15.40 | 6.77  | 7.92  | 1.1 | 45 |
| 74 | 35 | 48 | 50 | 20.10 | 4.40  | 14.10 | 6.76  | 1.3 |    |
| 75 | 27 | 39 | 39 | 4.77  | 5.05  | 6.43  | 4.88  |     | 35 |

|    |    |    |    |       |       |       |       |     |    |
|----|----|----|----|-------|-------|-------|-------|-----|----|
| 76 | 27 | 57 | 63 | 6.40  | 5.73  | 7.39  | 6.09  | 1.5 | 48 |
| 77 | 39 | 68 | 36 | 7.43  | 5.86  | 6.86  | 7.59  |     | 38 |
| 78 | 45 | 47 | 51 | 6.41  | 4.61  | 20.70 | 18.90 | 1.0 | 49 |
| 79 | 39 | 50 | 55 | 7.81  | 4.72  | 12.20 | 8.86  | 1.4 | 42 |
| 80 | 36 | 64 | 66 | 10.50 | 5.12  | 8.63  | 9.45  | 1.2 | 44 |
| 81 | 35 | 38 | 48 | 13.10 | 10.80 | 16.60 | 9.08  | 1.2 | 46 |
| 82 | 38 | 54 | 56 | 15.40 | 4.61  | 9.91  | 11.90 | 1.2 | 41 |
| 83 | 43 | 45 | 50 | 7.69  | 4.04  | 17.80 | 4.04  | 1.3 | 46 |
| 84 | 36 | 42 | 40 | 6.68  | 9.88  | 15.00 | 5.37  | 1.2 | 51 |
| 85 | 63 | 71 | 53 | 7.40  | 8.87  | 5.02  | 3.66  | 1.0 | 45 |
| 86 | 40 | 51 | 52 | 11.20 | 9.15  | 13.30 | 7.32  | 1.3 | 49 |
| 87 | 37 | 75 | 77 | 15.30 | 4.69  | 28.70 | 4.17  | 1.1 |    |
| 88 | 46 | 45 | 45 | 5.18  | 6.49  | 5.55  | 12.20 | 1.6 | 50 |
| 89 | 47 | 61 | 61 | 8.23  | 4.97  | 10.10 | 5.75  | 1.4 | 39 |
| 90 | 50 | 56 | 61 | 11.50 | 14.90 | 13.30 | 12.00 | 1.4 | 43 |
| 91 | 37 | 29 | 51 | 8.25  | 10.40 | 5.71  | 5.49  | 1.1 | 34 |
| 92 | 38 | 63 | 61 | 16.30 | 6.13  | 6.75  | 4.99  | 1.5 | 45 |
| 93 | 45 | 61 | 61 | 14.50 | 20.80 | 8.80  | 7.57  | 1.6 | 44 |
| 94 | 41 | 51 | 45 | 15.00 | 2.28  | 32.30 | 3.70  | 1.6 | 42 |
| 95 | 37 | 53 | 54 | 20.10 | 5.14  | 28.70 | 5.14  |     |    |
| 96 | 37 | 55 | 55 | 12.00 | 5.79  | 10.00 | 6.62  | 1.6 | 43 |
| 97 | 41 | 63 | 55 | 8.19  | 7.85  | 6.15  | 6.38  | 1.8 | 47 |
| 98 | 38 | 58 | 49 | 10.30 | 7.23  | 8.31  | 6.42  |     | 37 |

| sex    | predominant       | deep    | strategic | surface | age (years) | written anatomy exam (scores) |
|--------|-------------------|---------|-----------|---------|-------------|-------------------------------|
|        | learning approach | (score) | (score)   | (score) |             |                               |
| male   | deep              | 73      | 63        | 49      | 30          | 16                            |
| female | deep              | 63      | 56        | 59      | 21          | 26                            |
| male   | deep              | 62      | 65        | 42      | 29          | 16                            |
| female | surface           | 45      | 35        | 48      | 22          | 19                            |
| female | deep              | 66      | 66        | 56      | 24          |                               |
| female | deep              | 58      | 54        | 40      | 28          | 11                            |
| female | surface           | 58      | 78        | 78      | 21          | 20                            |
| female | surface           | 44      | 41        | 65      | 21          | 13                            |
| female | deep              | 61      | 50        | 43      | 27          | 17                            |
| female | deep              | 53      | 47        | 38      | 28          | 12                            |
| female | strategic         | 65      | 93        | 40      | 22          | 30                            |
| male   | surface           | 63      | 61        | 67      | 28          | 14                            |
| female | deep              | 57      | 47        | 52      | 23          | 22                            |
| female | deep              | 63      | 67        | 54      | 29          | 17                            |
| female |                   |         |           |         | 21          | 29                            |
| female | surface           | 63      | 71        | 75      | 21          | 6                             |
| female | deep              | 69      | 49        | 43      | 21          | 19                            |
| female | deep              | 64      | 60        | 55      | 20          | 13                            |
| male   | deep              | 53      | 53        | 40      | 21          | 18                            |
| female | deep              | 68      | 60        | 51      | 20          | 20                            |
| female | surface           | 62      | 81        | 81      | 21          | 6                             |
| female | deep /            | 51      | 63        | 35      | 22          | 27                            |
| female | surface           | 59      | 61        | 61      | 29          | 11                            |
| female | deep              | 64      | 57        | 31      | 20          | 17                            |
| female | deep              | 60      | 67        | 51      | 24          | 22                            |
| female | deep              | 52      | 53        | 44      | 21          | 24                            |
| female |                   |         |           |         | 22          | 19                            |
| male   | deep              | 62      | 54        | 45      | 24          | 21                            |
| female |                   |         |           |         | 21          | 22                            |
| female | strategic         | 56      | 74        | 53      | 22          | 21                            |
| female | deep              | 65      | 69        | 51      | 20          | 23                            |
| male   |                   |         |           |         | 22          | 15                            |
| female | deep              | 61      | 69        | 51      | 24          | 29                            |
| female | deep              | 64      | 60        | 42      | 22          | 14                            |
| male   | surface           | 54      | 73        | 73      | 22          | 23                            |
| female | deep              | 75      | 61        | 31      | 20          | 14                            |

|        |                  |    |    |    |    |    |
|--------|------------------|----|----|----|----|----|
| female | deep             | 58 | 66 | 44 | 20 | 24 |
| female | deep             | 62 | 55 | 45 | 22 | 20 |
| female | deep             | 58 | 59 | 45 | 22 | 22 |
| male   | deep             | 72 | 50 | 32 | 21 | 24 |
| male   | deep             | 58 | 53 | 31 | 22 | 15 |
| male   | dee / surface    | 48 | 48 | 48 | 22 | 19 |
| female | deep             | 51 | 61 | 48 | 21 | 15 |
| female | deep             | 65 | 65 | 40 | 22 | 23 |
| female | deep             | 59 | 60 | 39 | 20 | 18 |
| female |                  |    |    |    | 23 | 22 |
| female | deep             | 71 | 62 | 50 | 21 | 15 |
| female |                  |    |    |    | 22 |    |
| female | deep             | 59 | 45 | 55 | 22 | 20 |
| female | deep             | 69 | 64 | 35 | 21 | 17 |
| female | deep             | 57 | 50 | 44 | 20 | 20 |
| female |                  |    |    |    | 21 |    |
| female | surface          | 63 | 76 | 76 | 20 | 14 |
| female | deep             | 63 | 65 | 48 | 23 | 30 |
| female | deep             | 67 | 62 | 48 | 22 | 17 |
| female | strategic        | 50 | 78 | 33 | 21 | 16 |
| male   | deep             | 62 | 58 | 43 | 21 | 22 |
| female | deep             | 58 | 58 | 46 | 22 | 20 |
| female | surface          | 58 | 50 | 76 | 21 | 13 |
| male   | surface          | 59 | 87 | 87 | 22 | 28 |
| female | deep / surface   | 53 | 44 | 53 | 21 | 9  |
| female |                  |    |    |    | 21 | 28 |
| female | deep             | 70 | 59 | 36 | 23 | 31 |
| male   | strategic        | 66 | 86 | 34 | 21 | 16 |
| female | deep             | 68 | 78 | 45 | 20 | 14 |
| female | deep             | 51 | 60 | 47 | 20 | 14 |
| female | surface          | 52 | 69 | 69 | 20 | 16 |
| female | deep             | 61 | 50 | 52 | 22 | 22 |
| female |                  |    |    |    | 21 | 27 |
| male   | deep             | 61 | 55 | 48 | 22 | 16 |
| female | deep             | 65 | 66 | 42 | 20 | 17 |
| male   | deep             | 64 | 46 | 50 | 20 | 14 |
| female | deep / strategic | 48 | 60 | 20 | 21 | 22 |
| female | deep             | 59 | 71 | 36 | 21 | 25 |
| female | deep /           | 52 | 65 | 40 | 21 | 19 |

|        |           |    |    |    |    |    |
|--------|-----------|----|----|----|----|----|
| female | deep      | 60 | 71 | 30 | 20 | 11 |
| male   | strategic | 48 | 75 | 40 | 21 | 20 |
| male   | strategic | 66 | 87 | 41 | 21 | 24 |
| female | deep      | 62 | 58 | 35 | 21 | 11 |
| female | deep      | 67 | 55 | 44 | 21 | 27 |
| male   | deep      | 76 | 66 | 36 | 20 | 27 |
| male   | deep      | 67 | 69 | 47 | 21 | 19 |
| male   | deep      | 74 | 68 | 35 | 21 | 11 |
| male   | deep      | 56 | 52 | 46 | 20 | 21 |
| female | deep      | 73 | 50 | 58 | 21 | 15 |
| female |           |    |    |    | 21 | 25 |
| female |           |    |    |    | 20 | 10 |
| male   | deep      | 64 | 61 | 49 | 22 | 16 |
| female | deep /    | 54 | 67 | 50 | 20 | 16 |
| female |           |    |    |    | 21 | 20 |
| female | deep      | 61 | 55 | 37 | 22 | 23 |
| female | deep      | 71 | 51 | 56 | 20 | 12 |
| female | deep      | 64 | 72 | 54 | 20 | 16 |
| male   |           |    |    |    | 23 | 13 |
| male   | deep      | 67 | 74 | 45 | 20 | 15 |
| male   | deep      | 57 | 57 | 24 | 23 | 23 |
| female |           |    |    |    | 21 | 22 |
| female | surface   | 51 | 46 | 57 | 21 | 16 |
